# Supplementary material for: Beneficial Effects of Evogliptin, a Novel Dipeptidyl Peptidase 4 Inhibitor, on Adiposity with Increased Ppargc1a in White Adipose Tissue in Obese Mice
Source: PubMed Central journal article supplement (PMC4669177; doi:10.1371/journal.pone.0144064), 2015-12-03
Supplement: pone.0144064.s002.pdf [file pone.0144064.s002.pdf]

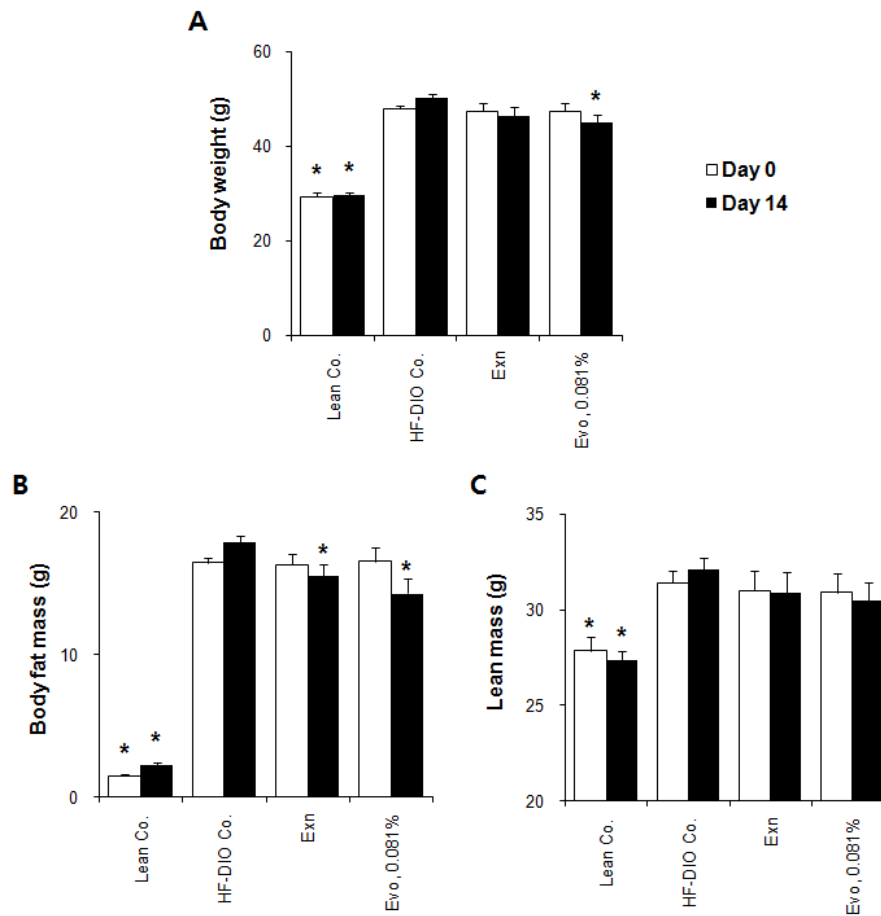

**S2 Fig. Body composition changes in Study 3.** After 2-week treatment of 30 g kg<sup>-1</sup> exenatide or 0.081% evogliptin [Study 3 as described in *Method* section], (A) body weight, (B) whole body fat mass, and (C) lean mass were assessed before (∅) and after 2-week treatment (∩) in HF-DIO mice (n=8/group). \*, *P* < 0.05 vs. HF-DIO control by One-way ANOVA at each time point.
