# Supplementary material for: Beneficial Effects of Evogliptin, a Novel Dipeptidyl Peptidase 4 Inhibitor, on Adiposity with Increased Ppargc1a in White Adipose Tissue in Obese Mice
Source: PubMed Central journal article supplement (PMC4669177; doi:10.1371/journal.pone.0144064), 2015-12-03
Supplement: pone.0144064.s003.pdf [file pone.0144064.s003.pdf]

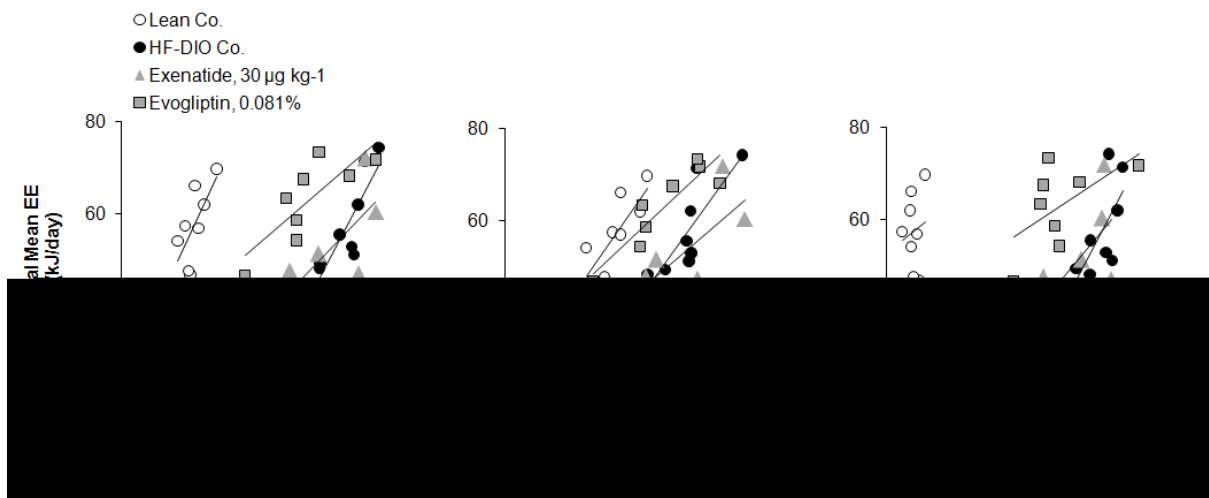

**S3 Fig. Analysis of treatment effects on total energy expenditure according to the body composition.** According to the previous report (Tschöp MH, et al., *Nat Methods*. 2011; 9: 57-63), energy expenditure was plotted vs. lean mass or fat mass in addition to body weight. Solid lines show fitted regression (n=8/group).
