# Supplementary material for: Beneficial Effects of Evogliptin, a Novel Dipeptidyl Peptidase 4 Inhibitor, on Adiposity with Increased Ppargc1a in White Adipose Tissue in Obese Mice
Source: PubMed Central journal article supplement (PMC4669177; doi:10.1371/journal.pone.0144064), 2015-12-03
Supplement: pone.0144064.s008.pdf [file pone.0144064.s008.pdf]

**S1 Table. Primers and probe for mouse genes used**

| <i>Gene name</i><br>(Accession No.) | <i>Primers</i>                                                              | <i>TaqMan Probe</i>                                               |
|-------------------------------------|-----------------------------------------------------------------------------|-------------------------------------------------------------------|
| <i>Pparg1a</i><br>(#19017)          | F: 5'-AGAAGCGGGAGTCTGAAAGG-3'<br>R: 5'-CAGTTCTGTCCGCGTTGTG-3'               | -                                                                 |
| <i>Cox4i1</i><br>(#12857)           | F: 5'-TGCTAGCCGCAGGCATTACT-3'<br>R: 5'-TCTGGGTGCCCAAAGAATCA-3'              | 5'-6FAM-<br>CGCTGGAGGAGGGGACCCAATT<br>CTCTA-TAMRA-3' <sup>a</sup> |
| <i>Pparg2</i><br>(#19016)           | F: 5'-GGTGAAACTCTGGGAGATTC-3'<br>R: 5'-CAACCATTGGGTCAGCTCTT-3'              | -                                                                 |
| <i>Dpp4</i><br>(#13482)             | F: 5'-GTGGCAAGAGGGGATCACTA-3'<br>R: 5'-CCCAGCCTGTGGTACTCATT-3'              | -                                                                 |
| <i>Hif1a</i><br>(#15251)            | F: 5'-TCAAGTCAGCAACGTGGAAG-3'<br>R: 5'-TATCGAGGCTGTGTCTGACTG-3'             | -                                                                 |
| <i>Srebp1c</i><br>(#20787)          | F: 5'-CCAGCAGGTCCCAGTTGTAT-3'<br>R: 5'-AGGTACTGTGGCCAAGATGG-3'              | -                                                                 |
| <i>Rps3</i><br>(#27050)             | F: 5'-ATCAGAGAGTTGACCGCAGTTG-3'<br>R: 5'-AATGAACCGAAGCACACCATAG-3'          | -                                                                 |
| <i>Ucp1</i>                         | #22227: P/N4331182, commercialized ABI gene expression probe and primer set |                                                                   |

- a. Strum JC, Shehee R, Virley D, Richardson J, Mattie M, Selley P, et al. Rosiglitazone induces mitochondrial biogenesis in mouse brain. *J Alzheimers Dis.* 2007; 11: 45-51.
- b. Abbreviations: ***Pparg1a*** for peroxisome proliferator-activated receptor- $\gamma$  coactivator 1 $\alpha$ , ***Cox4i1*** for mitochondrial complex IV subunit cytochrome C oxidase subunit 4, ***Pparg2*** for peroxisome proliferator-activated receptor- $\gamma$ 2, ***Dpp4*** for dipeptidyl peptidase 4, ***Hif1a*** for hypoxia inducible factor 1-  $\alpha$ , ***Srebp1c*** for sterol regulatory element binding protein-1c, and ***Rps3*** for ribosomal protein S3
