# Supplementary material for: Beneficial Effects of Evogliptin, a Novel Dipeptidyl Peptidase 4 Inhibitor, on Adiposity with Increased Ppargc1a in White Adipose Tissue in Obese Mice
Source: PubMed Central journal article supplement (PMC4669177; doi:10.1371/journal.pone.0144064), 2015-12-03
Supplement: pone.0144064.s009.pdf [file pone.0144064.s009.pdf]

**S2 Table. Body composition changes in Study 2 after 2-week treatment**

| Treatment groups         | Body wt (g)            |                    | Fat mass (g)            |                    | Lean mass (g) |                   |
|--------------------------|------------------------|--------------------|-------------------------|--------------------|---------------|-------------------|
|                          | Day 14                 | Changes vs. Day 0  | Day 14                  | Changes vs. Day 0  | Day 14        | Changes vs. Day 0 |
| <b>Lean Co.</b>          | 30.4±0.29              | +0.36 <sup>c</sup> | 2.25±0.12               | +0.30 <sup>c</sup> | 28.2±0.38     | +0.06             |
| <b>HF-DIO Co.</b>        | 37.9±0.71 <sup>a</sup> | +0.23              | 10.56±0.63 <sup>a</sup> | +0.62              | 27.3±0.40     | -0.40             |
| <b>Exn</b>               | 36.0±1.11 <sup>a</sup> | -1.51              | 9.19±0.60 <sup>a</sup>  | -0.74              | 26.9±0.67     | -0.77             |
| <b>Evogliptin 0.027%</b> | 37.1±1.32 <sup>a</sup> | -1.47              | 9.43±0.66 <sup>a</sup>  | -0.71              | 27.6±0.80     | -0.77             |
| <b>0.081%</b>            | 34.9±0.77 <sup>a</sup> | -2.88              | 7.75±0.45 <sup>ab</sup> | -2.26              | 27.2±0.65     | -0.62             |
| <b>0.27%</b>             | 32.8±0.91 <sup>b</sup> | -4.74 <sup>c</sup> | 6.49±0.35 <sup>ab</sup> | -3.59 <sup>c</sup> | 26.3±0.68     | -1.15             |

8 animals/group; a,  $P < 0.05$  vs. Lean Co. and b,  $P < 0.05$  vs. HF-DIO Co. by one-way ANOVA; c,  $P < 0.05$  vs. HF-DIO Co. by RM two-way ANOVA
